# Supplementary material
Source: publisher site journal article supplement (https://www.dovepress.com/article/590189)
Supplement: Supplementary file 1 [file Table%20S1.docx]

|  |  |  | Baseline | Week 16 | Week 28 | Week 52 | Week 78 | Week 104 |
| --- | --- | --- | --- | --- | --- | --- | --- | --- |
| WHO-5 score | MI | n | 784 | 784 | 784 | 784 | 784 | 784 |
|  |  | Mean (95% CI) | 53.9 (52.3, 55.4) | 63.4 (61.9, 64.9) | 64.3 (62.8, 65.9) | 64.7 (63.0, 66.4) | 65.7 (64.0, 67.4) | 67.2 (65.4, 69.0) |
|  | LOCF | n | 709 | 596 | 649 | 656 | 660 | 662 |
|  |  | Mean (95% CI) | 53.7 (52.2, 55.3) | 63.2 (61.5, 64.8) | 64.3 (62.7, 65.9) | 64.5 (62.9, 66.1) | 65.1 (63.4, 66.7) | 65.6 (63.9, 67.2) |
| PASI | MI | n | 784 | 784 | 784 | 784 | 784 | 784 |
|  |  | Mean (95% CI) | 12.9 (12.6, 13.1) | 2.5 (2.2, 2.7) | 1.8 (1.6, 2.1) | 1.8 (1.6, 2.0) | 1.7 (1.5, 2.0) | 1.7 (1.5, 1.9) |
|  | LOCF | n | 768 | 678 | 704 | 730 | 731 | 732 |
|  |  | Mean (95% CI) | 12.9 (12.3, 13.5) | 2.4 (2.2, 2.7) | 1.9 (1.6, 2.1) | 1.8 (1.6, 2.1) | 1.9 (1.6, 2.1) | 1.9 (1.7, 2.1) |
| DLQI-R | MI | n | 784 | 784 | 784 | 784 | 784 | 784 |
|  |  | Mean (95% CI) | 12.0 (11.7, 12.4) | 4.5 (4.1, 4.9) | 3.8 (3.4, 4.2) | 3.9 (3.5, 4.3) | 3.2 (2.8, 3.6) | 3.1 (2.8, 3.5) |
|  | LOCF | n | 647 | 530 | 597 | 609 | 621 | 624 |
|  |  | Mean (95% CI) | 12.0 (11.4, 12.6) | 4.3 (3.8, 4.7) | 3.7 (3.3, 4.1) | 3.8 (3.3, 4.2) | 3.5 (3.1, 3.9) | 3.5 (3.1, 3.9) |

**Table S1** Mean absolute WHO-5, PASI and DLQI-R scores up to Week 104 (MI and LOCF)
